# Supplementary material for: High mutation rates limit evolutionary adaptation in Escherichia coli
Source: PLoS Genet. 2018 Apr 27;14(4):e1007324. doi: 10.1371/journal.pgen.1007324 (PMC5942850; doi:10.1371/journal.pgen.1007324)
Supplement: S2 Table — (XLSX) [file pgen.1007324.s017.xlsx]

## Sheet: S2
Gene
ada
ahpC
ahpF
alkA
alkB
dam
dcm
dinB
dinG
dnaA
dnaB
dnaC
dnaE
dnaG
dnaN
dnaQ
dnaX
dps
exoX
fnr
fur
glyQ
glyS
glyV
glyW
glyX
hns
lexA
mfd
miaA
mutH
mutL
mutM
mutS
mutT
mutY
ndh
nei
nfi
nfo
nth
nuoA
nuoB
nuoC
nuoE
nuoF
nuoG
nuoH
nuoI
nuoJ
nuoK
nuoL
nuoM
nuoN
ogt
oxyR
phr
pnp
polA
polB
ratA
ratB
recA
recB
recC
recD
recF
recG
recJ
recN
recO
recR
recT
rpoS
ruvA
ruvB
ruvC
sbcB
sbcD
sodA
sodB
sodC
soxR
ssb
topA
topB
umuC
umuD
ung
ung
uvrA
uvrB
uvrC
uvrD
vsr
xthA
