# Supplementary material for: High mutation rates limit evolutionary adaptation in Escherichia coli
Source: PLoS Genet. 2018 Apr 27;14(4):e1007324. doi: 10.1371/journal.pgen.1007324 (PMC5942850; doi:10.1371/journal.pgen.1007324)
Supplement: S3 Table — The columns are as follows: "Strain" is the identity of the ancestral strain (e.g., MRS, MRM, MRL, MRXL); "Replicate" identifies the replicate population; "μ" is the mutation rate in units of number of mutations per bp per cell generation; "μ 95% confidence intervals" "Upper" and "Lower" give the confidence in the mutation rate estimate; "U" is the genomic mutation rate in number of mutations per genome and per cell generation; "U 95% confidence intervals" "Upper" and "Lower" give the confidence in the genomic mutation rate estimate; "NeU" is the estimated number of mutations to occur in an evolving population each generation. Mutation rates were measured at generations 0 ("Ancestor" replicates) and 3000 (all other replicates). (XLSX) [file pgen.1007324.s018.xlsx]

## Sheet: S3
Strain	Replicate	µ (×1011)	µ 95% confidence intervals		U	U 95% confidence intervals		NeU
			Upper (×1011)	Lower (×1011)		Upper	Lower
MRS	Ancestor	7.2	9.6	5.5	0.00034	0.00045	0.00025	-
MRS	1	5.4	7.9	3.7	0.00025	0.00037	0.00017	19
MRS	2	1.2	3	0.46	5e-05	0.00014	2e-05	3.9
MRS	4	1.5	3.6	0.58	7e-05	0.00017	3e-05	5.2
MRS	5	6.7	10	4.4	0.00031	0.00048	0.00021	25
MRS	6	72	91	58	0.00336	0.00423	0.00267	220
MRS	8	2.4	3.7	1.5	0.00011	0.00017	7e-05	8.4
MRM	Ancestor	51	72	36	0.00235	0.00332	0.00165	-
MRM	1	30	38	24	0.00138	0.00175	0.00109	110
MRM	2	18	31	10	0.00082	0.00143	0.00047	66
MRM	3	29	39	22	0.00137	0.00179	0.00104	120
MRM	4	13	17	9.7	0.0006	0.00081	0.00045	55
MRM	5	5.3	10	2.7	0.00025	0.00048	0.00013	12
MRM	6	46	57	36	0.00212	0.00266	0.00169	200
MRM	7	32	42	25	0.00149	0.00193	0.00116	110
MRM	8	27	40	18	0.00124	0.00184	0.00084	96
MRL	Ancestor	89	120	64	0.00414	0.00579	0.00296	-
MRL	1	39	53	29	0.00181	0.00246	0.00133	160
MRL	2	55	78	38	0.00254	0.00362	0.00178	160
MRL	3	32	63	16	0.00148	0.00292	0.00075	98
MRL	4	29	40	21	0.00134	0.00184	0.00098	80
MRL	5	99	120	80	0.0046	0.00571	0.0037	260
MRL	6	72	91	58	0.00336	0.00423	0.00267	180
MRL	7	150	250	94	0.00706	0.01157	0.00434	490
MRL	8	140	250	78	0.00649	0.0117	0.0036	320
MRXL	Ancestor	770	910	660	0.03596	0.04204	0.03079	-
MRXL	1	330	400	260	0.0151	0.01876	0.01216	690
MRXL	2	260	330	210	0.01229	0.01523	0.00987	560
MRXL	3	130	210	87	0.00626	0.00974	0.00403	390
MRXL	4	97	170	54	0.00452	0.00811	0.00252	220
MRXL	5	37	47	30	0.00173	0.00218	0.00137	81
MRXL	6	89	130	62	0.00414	0.00594	0.00288	210
MRXL	7	150	190	120	0.00693	0.00896	0.00536	290
MRXL	8	17	24	12	0.00078	0.00111	0.00054	34
