# Supplementary material for: High mutation rates limit evolutionary adaptation in Escherichia coli
Source: PLOS journal article supplement (doi:10.1371/journal.pgen.1007324), 2018-04-27
Supplement: S21 (10.1371/journal.pgen.1007324.s021) [file journal.pgen.1007324.s021]

### **Text S3. The waiting time for the establishment of a new beneficial allele.**

We estimated the waiting time for the establishment of a new beneficial allele as the inverse of the supply rate of beneficial mutations that survive drift ( $1/(2Nus)$ ), using the nominal effective population size  $N_e$  for  $N$ , the mean effect size of a beneficial mutation  $s_b = 0.086$  [135], and the beneficial mutation rate estimated as the expected fraction of the total genomic mutation rate that confers a beneficial mutation ( $0.031 = u_b / u = 7.6 \times 10^{-11} / 2.47 \times 10^{-9}$ , from [135]), given by  $U_b = 0.031U$ . The longest expected wait to establish a beneficial mutation for any replication population is 44 generations ( $MR^{S_2}$ :  $U = 5.4 \times 10^{-5}$ ,  $N_e = 78,900$ ).

### **Text S3 References**

135. Kassen R, Bataillon T. Distribution of fitness effects among beneficial mutations before selection in experimental populations of bacteria. *Nat Genet.* 2006;38: 484–488. doi:10.1038/ng1751
